# Supplementary material for: Low-temperature-induced changes in the transcriptome reveal a major role of CgSVP genes in regulating flowering of Cymbidium goeringii
Source: BMC Genomics. 2019 Jan 17;20:53. doi: 10.1186/s12864-019-5425-7 (PMC6335714; doi:10.1186/s12864-019-5425-7)
Supplement: Supplementary file 1 — Table S1. The primers used for Realtime RT-PCR. (XLSX 11 kb) [file 12864_2019_5425_MOESM1_ESM.xlsx]

## Sheet: Sheet1
TableS1:The primers used for Realtime RT-PCR.
Primer name	Sequence(5'to3')
43097RT-F	AGTTAGGGGACGAAAGAGCC
43097RT-R	CTTCCAGGCCACCCAACATA
8764RT-F	TGCTGAAGACCATTGAGCGT
8764RT-R	GCTCGAGGCGACTCTCTAAC
CgUBQ-F	CCGGATCAGCAAAGGTTGA
CgUBQ-R	AAGATTTGCATCCCTCCCC
CgACT-F	CAATGAGCTTCGTGTTGCCC
CgACT-R	GATACGAACCAGTTGTGCGG
AP1RT-F	CAACATTAGGGTTTCAGTGTCAAT
AP1RT-R	CGAAACTGGTTAAAAATGGATTAC
49009RT-F	TTAATTTGTGGAGCGCGCAG
49009RT-R	ACGAGCTTCAAAGCCTCATCT
50389RT-F	TTGAGCTCCTTTGCGTGCTA
50389RT-R	AAAGTCACCTGCCTACTCGC
36586RT-F	CTCCACCACTGGAAAGCTCG
36586RT-R	ACCGCGCAGTTCCTTAATGT
CL551RT-F	TCCTGCTCTATCATGCTCCG
CL551RT-R	AGACGCAATGGCCTCATCAA
SOC1RT-F	ATACATCGGATAAAAAAATGGTGA
SOC1RT-R	AGGTCATCCTTTCATCAACTGTTG
38228RT_F	CAACATTAGGGTTTCAGTGTCAAT
38228RT_R	CGAAACTGGTTAAAAATGGATTAC
717274-F	CAGTTAATAGGTTTTTGGAGAGCG
717274-R	ACCAAATGTAGTCTGATGCCATAA
36141RT_F	TGTTTAAGAAGGCGGAGGAGC
36141RT_R	TGCTTGCCCATTCTCGCATAA
44547RT_F	TTGGGCTCATCGTCTTCTCG
44547RT_R	CTTAGCTGGCGAGTTGCTTC
28009RT_F	TCTCTGTGATGCTGATGTCGG
28009RT_R	CTCAGCCTCCTGAGTTGTAAGG
LFYRT-F	TGGGGATTTGGGGTTTACGG
LFYRT-R	TGGCCCGCATGATGATGATT
